# Supplementary material
Source: HighWire-hosted journal article supplement (https://bmjopen.bmj.com/content/11/7/e045075)
Supplement: inline-supplementary-material-1 [file inline-supplementary-material-1.pdf]

## Appendix 1: Search strategy

A Medline (OVID) search strategy<sup>ies</sup> has<sup>ve</sup> been provided as an example; the below search strategy<sup>ies</sup> will be adapted for EMBASE, Cochrane Library, CINAHL and Web of Science.

### Decision Aids

#### Medline (OVID)

1. Decision Support Techniques/
2. (Decision adj3 (support\* OR aid\* OR navigation OR patient\* OR tool\*)).ti,ab.
3. or/1-2
4. Genes, BRCA1/
5. BRCA1 Protein/
6. Genes, BRCA2/
7. BRCA2 Protein/
8. (BRCA\* or brca\* or hereditary breast ovarian cancer syndrome or hereditary breast ovarian cancer syndrome or HBOC).mp.
9. ((BRCA\* or brca\*) adj5 (carrier\* or tumor\* or tumour\* or gene\* or suppress\* or protein\* or mutat\* or alter\* or damage\* or inherit\* or heredit\*)).mp.
10. or/4-9
11. 3 AND 10
